# Supplementary material for: Emerging investigators series: using an analytical solution approach to permit high volume groundwater withdrawals
Source: Royal Society of Chemistry journal article supplement (doi:10.1039/c6ew00108d), 2016-01-01
Supplement: c6ew00108d1.pdf [file c6ew00108d1.pdf]

Supplemental Information:

**Using an Analytical Solution Approach to Permit High Volume Groundwater Withdrawals**

Ivan S. Jayawan, Avery H. Demond, Brian R. Ellis\*

Department of Civil and Environmental Engineering  
University of Michigan, Ann Arbor, MI

\*corresponding author

ph: 734-763-5470; email: brellis@umich.edu

**List of Equations:**

|                                                                                |    |
|--------------------------------------------------------------------------------|----|
| Equation SI-1: Uncertainty in stream depletion $Q_s$ .....                     | S2 |
| Equation SI-2: Partial derivative of Eqn. SI-1 with respect to $S$ .....       | S2 |
| Equation SI-3: Partial derivative of Eqn. SI-1 with respect to $T$ .....       | S2 |
| Equation SI-4: Partial derivative of Eqn. SI-1 with respect to $\lambda$ ..... | S2 |

**List of Figures:**

|                                                                                                           |    |
|-----------------------------------------------------------------------------------------------------------|----|
| Figure SI-1: Map of the study site in Kalkaska County in the northern Lower Peninsula of Michigan         | S3 |
| Figure SI-2: Map of the study site in Calhoun County in the southwestern Lower Peninsula of Michigan..... | S3 |

**List of Tables:**

|                                                                                                                                                                    |    |
|--------------------------------------------------------------------------------------------------------------------------------------------------------------------|----|
| Table SI-1: Water withdrawal management zones for different stream types based on maximum values of streamflow depletion as a percentage of stream index flow..... | S4 |
| Table SI-2: Additional MODFLOW parameter values for the study site in Kalkaska County.....                                                                         | S5 |
| Table SI-3: Additional MODFLOW parameter values for the study site in Calhoun County.....                                                                          | S6 |

$$dQ_s = \sqrt{\left(\frac{\partial Q_s}{\partial S} dS\right)^2 + \left(\frac{\partial Q_s}{\partial T} dT\right)^2 + \left(\frac{\partial Q_s}{\partial \lambda} d\lambda\right)^2}$$

**Equation SI-1.** Uncertainty in stream depletion  $Q_s$ , due to errors in the storage coefficient,  $S$ , transmissivity,  $T$  and streambed conductance,  $\lambda$ .

$$\begin{aligned} \frac{\partial Q_s}{\partial S} = & \frac{Q_w \exp\left(-\frac{Sd^2}{4Tt}\right) \sqrt{\frac{Sd^2}{Tt}}}{2S\sqrt{\pi}} + \frac{Q_w \lambda^2 t \exp\left(\frac{\lambda^2 t}{4ST} + \frac{\lambda d}{2T}\right) \operatorname{erfc}\left(\sqrt{\frac{\lambda^2 t}{4ST}} + \sqrt{\frac{Sd^2}{4Tt}}\right)}{4S^2 T} \\ & + \frac{2Q_w \left( \frac{d^2}{4Tt\sqrt{\frac{Sd^2}{Tt}}} - \frac{\lambda^2 t}{4S^2 T\sqrt{\frac{\lambda^2 t}{ST}}} \right) \exp\left[-\left(\frac{1}{2}\sqrt{\frac{Sd^2}{Tt}} + \frac{1}{2}\sqrt{\frac{\lambda^2 t}{ST}}\right)^2 + \frac{\lambda d}{2T} + \frac{\lambda^2 t}{4ST}\right]}{\sqrt{\pi}} \end{aligned}$$

**Equation SI-2.** Partial derivative of Eqn. SI-1 with respect to the storage coefficient,  $S$ .

$$\begin{aligned} \frac{\partial Q_s}{\partial T} = & \frac{Q_w \exp\left(-\frac{Sd^2}{4Tt}\right) \sqrt{\frac{Sd^2}{Tt}}}{2T\sqrt{\pi}} + \frac{2Q_w \left( -\frac{Sd^2}{4T^2 t\sqrt{\frac{Sd^2}{Tt}}} - \frac{\lambda^2 t}{4ST^2\sqrt{\frac{\lambda^2 t}{ST}}} \right) \exp\left[-\left(\frac{1}{2}\sqrt{\frac{Sd^2}{Tt}} + \frac{1}{2}\sqrt{\frac{\lambda^2 t}{ST}}\right)^2 + \frac{\lambda^2 t}{4ST} + \frac{\lambda d}{2T}\right]}{\sqrt{\pi}} \\ & - Q_w \exp\left(\frac{\lambda^2 t}{4ST} + \frac{\lambda d}{2T}\right) \left( -\frac{\lambda d}{2T^2} - \frac{\lambda^2 t}{4ST^2} \right) \operatorname{erfc}\left(\frac{1}{2}\sqrt{\frac{\lambda^2 t}{ST}} + \frac{1}{2}\sqrt{\frac{Sd^2}{Tt}}\right) \end{aligned}$$

**Equation SI-3.** Partial derivative of Eqn. SI-1 with respect to the transmissivity,  $T$ .

$$\begin{aligned} \frac{\partial Q_s}{\partial \lambda} = & \frac{Q_w \lambda t \exp\left[-\left(\frac{1}{2}\sqrt{\frac{Sd^2}{Tt}} + \frac{1}{2}\sqrt{\frac{\lambda^2 t}{ST}}\right)^2 + \frac{\lambda^2 t}{4ST} + \frac{\lambda d}{2T}\right]}{ST\sqrt{\pi}\sqrt{\frac{\lambda^2 t}{ST}}} \\ & - Q_w \exp\left(\frac{\lambda^2 t}{4ST} + \frac{\lambda d}{2T}\right) \left( \frac{d}{2T} + \frac{\lambda t}{2ST} \right) \operatorname{erfc}\left(\frac{1}{2}\sqrt{\frac{\lambda^2 t}{ST}} + \frac{1}{2}\sqrt{\frac{Sd^2}{Tt}}\right) \end{aligned}$$

**Equation SI-4.** Partial derivative of Eqn. SI-1 with respect to the streambed conductance,  $\lambda$ .

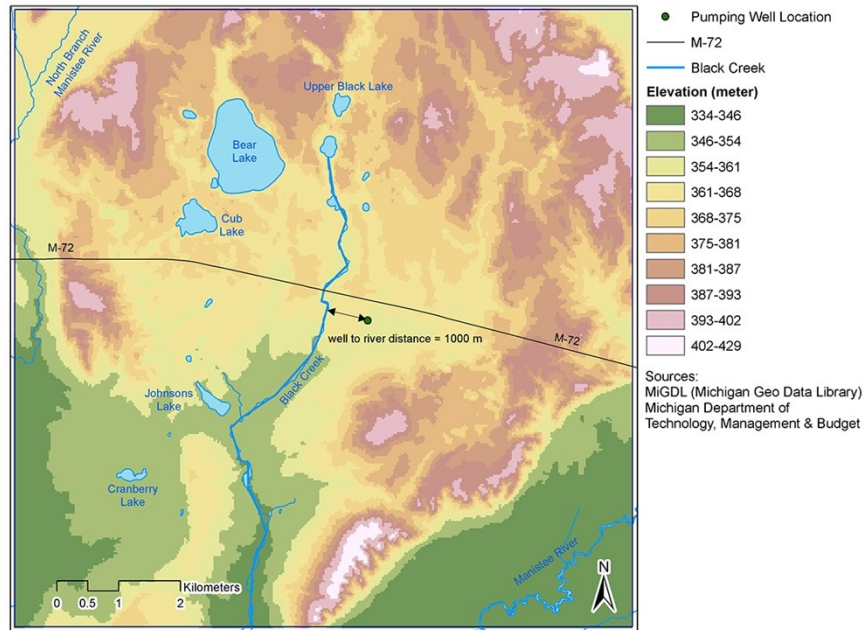

**Figure SI-1.** Map of the study site in Kalkaska County in the northern Lower Peninsula of Michigan.

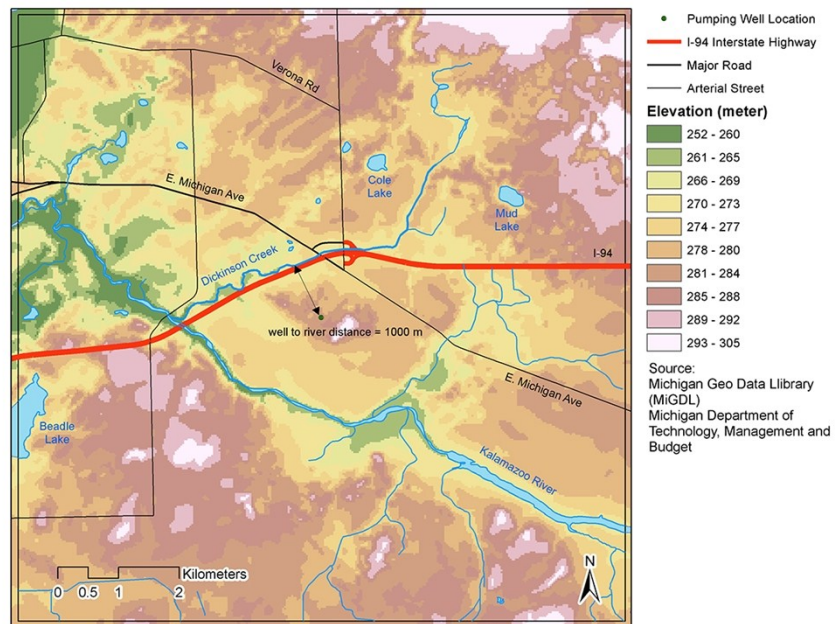

**Figure SI-2.** Map of the study site in Calhoun County in the southwestern Lower Peninsula of Michigan.

| Stream Type       |             | Water Withdrawal Management Zone |             |               |        |
|-------------------|-------------|----------------------------------|-------------|---------------|--------|
|                   |             | Zone A                           | Zone B      | Zone C        | Zone D |
| Cold              | Stream      | < 14%                            | NA          | 14 to < 20%   | ≥ 20%  |
|                   | Small River | < 10.5%                          |             | 10.5 to < 21% | ≥ 21%  |
| Cold Transitional | Stream      | NA                               | < 4%        | NA            | ≥ 4%   |
|                   | Small River |                                  | < 2%        |               | ≥ 2%   |
|                   | Large River |                                  | < 3%        |               | ≥ 3%   |
| Cool              | Stream      | < 6%                             | 6 to < 15%  | 15 to < 25%   | ≥ 25%  |
|                   | Small River | < 15%                            | 15 to < 19% | 19 to < 25%   | ≥ 25%  |
|                   | Large River | < 14%                            | 14 to < 19% | 19 to < 25%   | ≥ 25%  |
| Warm              | Stream      | < 10%                            | 10 to < 18% | 18 to < 24%   | ≥ 24%  |
|                   | Small River | < 8%                             | 8 to < 13%  | 13 to < 17%   | ≥ 17%  |
|                   | Large River | < 10%                            | 10 to < 16% | 16 to < 22%   | ≥ 22%  |

**Table SI-1.** Water withdrawal management zones for different stream types<sup>1</sup> based on maximum values of streamflow depletion as a percentage of stream index flow ( $Q_{s,max}/Q_{index} \times 100$ ). The WWAT automatically requires a site specific review for any HVGW proposal that falls into either Zone C or Zone D. NA: not applicable. Cold stream types do not have a Zone B; cold transitional stream types do not have Zones A or D.

| Description                                                                 | Layer #1                                                    | Layer #2                                             | Layer #3                                             |
|-----------------------------------------------------------------------------|-------------------------------------------------------------|------------------------------------------------------|------------------------------------------------------|
| Boundary Conditions                                                         |                                                             |                                                      |                                                      |
| North Boundary                                                              | Constant Head<br>361.8 m (N.W.) to<br>346.4 m (N.E.)        | Constant Head<br>361.8 m (N.W.) to<br>346.4 m (N.E.) | Constant Head<br>361.8 m (N.W.) to<br>346.4 m (N.E.) |
| East Boundary                                                               | Constant Head<br>346.4 m (N.E.) to<br>337 m (S.E.)          | No Flow                                              | No Flow                                              |
| West Boundary                                                               | Constant Head<br>361.8 m (N.W.) to<br>331 m (S.W.)          | No Flow                                              | No Flow                                              |
| South Boundary                                                              | Constant Head<br>331 m (S.W.) to<br>337 m (S.E.)            | Constant Head<br>331 m (S.W.) to<br>337 m (S.E.)     | Constant Head<br>331 m (S.W.) to<br>337 m (S.E.)     |
| Thickness [m]                                                               | 20 – 120                                                    | 1 – 20                                               | 200 – 230                                            |
| Horizontal Hydraulic<br>Conductivity <sup>‡</sup> ,<br>$K_x = K_y$ [m/d]    | 3.97                                                        | $8.64 \times 10^{-6}$                                | $1.10 \times 10^{-2}$                                |
| Vertical Hydraulic<br>Conductivity <sup>‡</sup> , $K_z$<br>[m/day]          | $3.97 \times 10^{-1}$                                       | $8.64 \times 10^{-7}$                                | $1.10 \times 10^{-3}$                                |
| Storage Coefficient <sup>§</sup> , $S$<br>[-]                               | 0.16                                                        | 0.10                                                 | 0.16                                                 |
| Elevation of Bottom of<br>Layer #3                                          | 100 m                                                       |                                                      |                                                      |
| Spatial Discretization                                                      | 200 m × 200 m (largest cell) to 25 m × 25 m (smallest cell) |                                                      |                                                      |
| Specific Discharge of<br>Screened Aquifer in<br>Absence of Pumping<br>[m/d] | 0.18                                                        |                                                      |                                                      |
| Elevation of Stream<br>Bottom (North – South)<br>[m]                        | 359 – 339                                                   |                                                      |                                                      |
| Streambed Slope [-]                                                         | $2.6 \times 10^{-3}$                                        |                                                      |                                                      |
| Manning's Roughness<br>Coefficient for Stream<br>Bed <sup>‡</sup> [-]       | 0.025                                                       |                                                      |                                                      |

**Table SI-2.** Additional MODFLOW parameter values for the study site in Kalkaska County. <sup>§</sup>The values of  $S$  were based on typical values presented in Morris and Johnson.<sup>2</sup> <sup>‡</sup>The horizontal hydraulic conductivities were calibrated values. <sup>‡</sup> $K_z$  was assumed to be 1/10 of the horizontal hydraulic conductivity. <sup>‡</sup>Manning's roughness coefficient was based on typical values presented in Arcement and Schneider.<sup>4</sup>

| Description                                                                   | Layer #1                                                    | Layer #2              | Layer #3                                             |
|-------------------------------------------------------------------------------|-------------------------------------------------------------|-----------------------|------------------------------------------------------|
| Boundary Conditions                                                           |                                                             |                       |                                                      |
| North Boundary                                                                | Constant Head<br>253.0 m (N.W.) to<br>279.3 m (N.E.)        | No Flow               | Constant Head<br>253.0 m (N.W.) to<br>276.0 m (N.E.) |
| East Boundary                                                                 | Constant Head<br>279.3 m (N.E.) to<br>281.0 m (S.E.)        | No Flow               | Constant Head<br>276.0 m (N.E.) to<br>273.2 m (S.E.) |
| West Boundary                                                                 | Constant Head<br>253.0 m (N.W.) to<br>274.5 m (S.W.)        | No Flow               | Constant Head<br>253.0 m (N.W.) to<br>281.0 m (S.W.) |
| South Boundary                                                                | Constant Head<br>274.5 m (S.W.) to<br>281.0 m (S.E.)        | No Flow               | Constant Head<br>281.0 m (S.W.) to<br>273.2 m (S.E.) |
| Thickness [m]                                                                 | 7 – 40                                                      | 1 – 5                 | 90 – 105                                             |
| Horizontal Hydraulic<br>Conductivity <sup>‡</sup> ,<br>$K_x = K_y$ [m/day]    | $9.50 \times 10^2$                                          | $8.64 \times 10^{-6}$ | $4.32 \times 10^{-3}$                                |
| Vertical Hydraulic<br>Conductivity <sup>‡</sup> , $K_z$<br>[m/day]            | 95.0                                                        | $8.64 \times 10^{-7}$ | $4.32 \times 10^{-4}$                                |
| Storage Coefficient <sup>§</sup> , S<br>[-]                                   | 0.16                                                        | 0.10                  | $10^{-5}$                                            |
| Elevation of Bottom of<br>Layer #3                                            | 150 m                                                       |                       |                                                      |
| Spatial Discretization                                                        | 400 m × 400 m (largest cell) to 25 m × 25 m (smallest cell) |                       |                                                      |
| Specific Discharge of<br>Screened Aquifer in<br>Absence of Pumping<br>[m/day] | 0.26                                                        |                       |                                                      |
| Elevation of Stream<br>Bottom (North –<br>South) [m]                          | 269 – 265 m                                                 |                       |                                                      |
| Streambed Slope [-]                                                           | $7.8 \times 10^{-4}$                                        |                       |                                                      |
| Manning's Roughness<br>Coefficient <sup>‡</sup> for Stream<br>Bed [-]         | 0.025                                                       |                       |                                                      |

**Table SI-3.** Additional MODFLOW parameter values for the study site in Calhoun County. <sup>§</sup>The values of  $S$  were based on typical values presented in Morris and Johnson.<sup>2</sup> <sup>‡</sup>The horizontal hydraulic conductivities were calibrated values. <sup>‡</sup>  $K_z$  was assumed to be 1/10 of the horizontal hydraulic conductivity. <sup>‡</sup>Manning's roughness coefficient was based on typical values presented in Arcement and Schneider.<sup>4</sup>

## **References**

- 1 D. A. Hamilton and P. W. Seelbach, *Michigan's Water Withdrawal Assessment Process and Internet Screening Tool*, Fisheries Special Rpt. 55, Michigan Department of Natural Resources, Lansing, MI, 2011.
- 2 D. A. Morris and A. I. Johnson, *Summary of Hydrologic and Physical Properties of Rock and Soil Materials, as Analyzed by the Hydrologic Laboratory of the U.S. Geological Survey, 1948-60*, Geological Survey Water-Supply Paper 1839-D, U.S. Government Printing Office, Washington, D.C., 1967.
- 3 Michigan Department of Technology, Management and Budget, *Michigan Geographic Data Library*, <https://www.mcgi.state.mi.us/mgdl/> (accessed May 2015).
- 4 G. J. Arcement and V. R. Schneider. *Guide for Selecting Manning's Roughness Coefficients for Natural Channels and Flood Plains*, U.S. Geological Water-Supply Paper 2339, U.S. Government Printing Office, Washington, D.C., 1989.
